# Supplementary material for: The Impact of a Six‐Year Climate Anomaly on the “Spanish Flu” Pandemic and WWI
Source: PubMed Central journal article supplement — Geohealth. 2020 Sep 1;4(9):e2020GH000277. doi: 10.1029/2020GH000277 (PMC7513628; doi:10.1029/2020gh000277), 2020-09-01
Supplement: GH2-4-e2020GH000277-s001.pdf [file GH2-4-e2020GH000277-s001.pdf]

1  
2  
3  
4  
5  
6  
7  
8  
9  
10  
11  
12  
13  
14  
15  
16  
17  
18  
19  
20  
21  
22  
23  
24  
25  
26  
27  
28  
29  
30  
31  
32  
33  
34  
35  
36  
37  
38  
39  
40  
41  
42  
43  
44  
45  
46

*GeoHealth*  
**Supporting information for**

**The impact of a six-year climate anomaly on the ‘Spanish Flu’ Pandemic and WWI**

Alexander F. More<sup>1,2,3</sup>, Christopher P. Loveluck<sup>4</sup>, Heather Clifford<sup>2</sup>, Michael J. Handley<sup>2</sup>, Elena V. Koroktikh<sup>2</sup>, Andrei V. Kurbatov<sup>2</sup>, Michael McCormick<sup>1</sup> and Paul A. Mayewski<sup>2</sup>

<sup>1</sup>Harvard University, Initiative for the Science of the Human Past, Cambridge, MA, U.S.A.

<sup>2</sup>Climate Change Institute, University of Maine, Orono, ME, U.S.A.

<sup>3</sup>Department of Public Health, Long Island University, NYC, NY, U.S.A.

<sup>4</sup>Department of Classics & Archaeology, School of Humanities, University of Nottingham, Nottingham, U.K.

**Contents of this file:**

Note on methodology

Figures S1-S7

**Note on methodology**

The Colle Gnifetti environmental records presented in this publication were obtained following methodologies already published in detail in Sneed et al. 2015, More et al. 2017, More et al. 2018, Bohleber et al. 2018, Clifford et al. 2019. All other data presented—precipitation, mortality, and temperature—was published by authors not involved with our research group.

47 **Supplemental figures**  
48

**Mean Sea Level Pressure (hPa)**  
November 1914

ECMWF ERA-20C

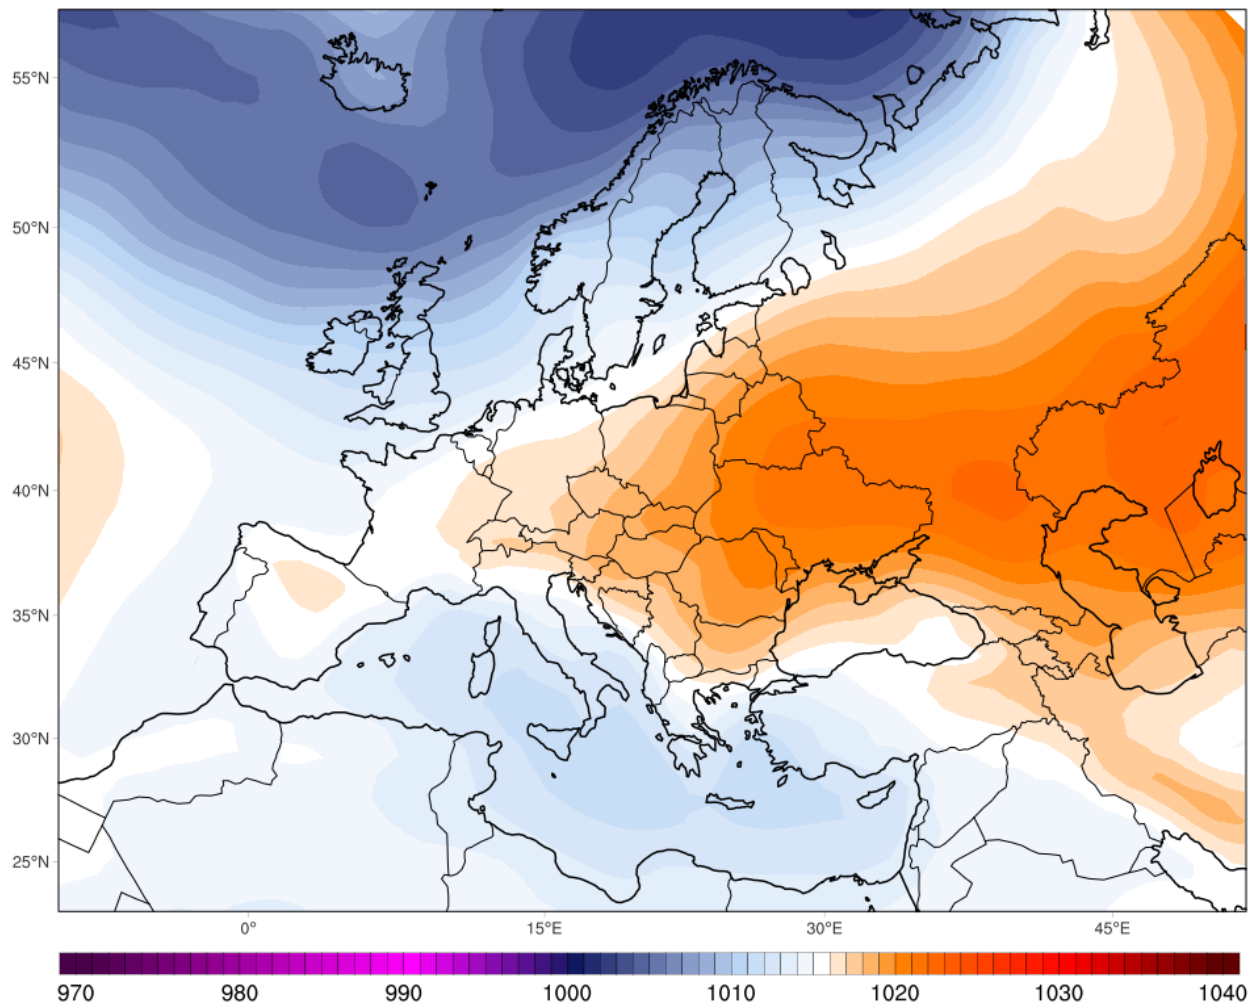

ClimateReanalyzer.org | Climate Change Institute | University of Maine

49 **Figure S1.** Mean sea-level pressure map of Europe obtained from Climate Reanalyzer™ using  
50 ECMWF ERA-20C dataset for November, 1914.  
51  
52

Mean Sea Level Pressure (hPa)  
January 1915

ECMWF ERA-20C

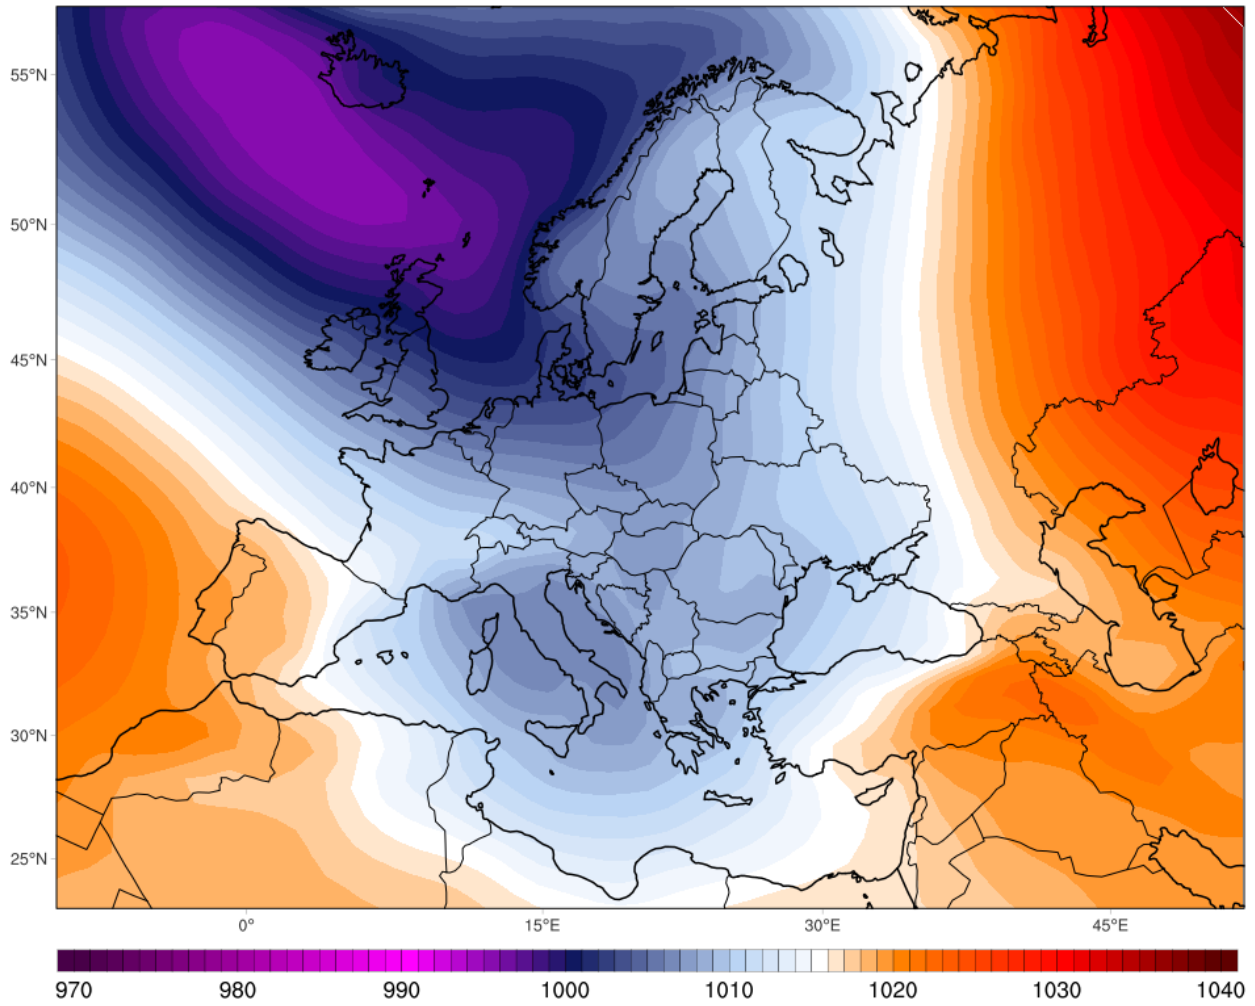

ClimateReanalyzer.org | Climate Change Institute | University of Maine

53  
54  
55

**Figure S2.** Mean sea-level pressure map of Europe obtained from Climate Reanalyzer™ using ECMWF ERA-20C dataset for January, 1915.

Mean Sea Level Pressure (hPa)  
February 1915

ECMWF ERA-20C

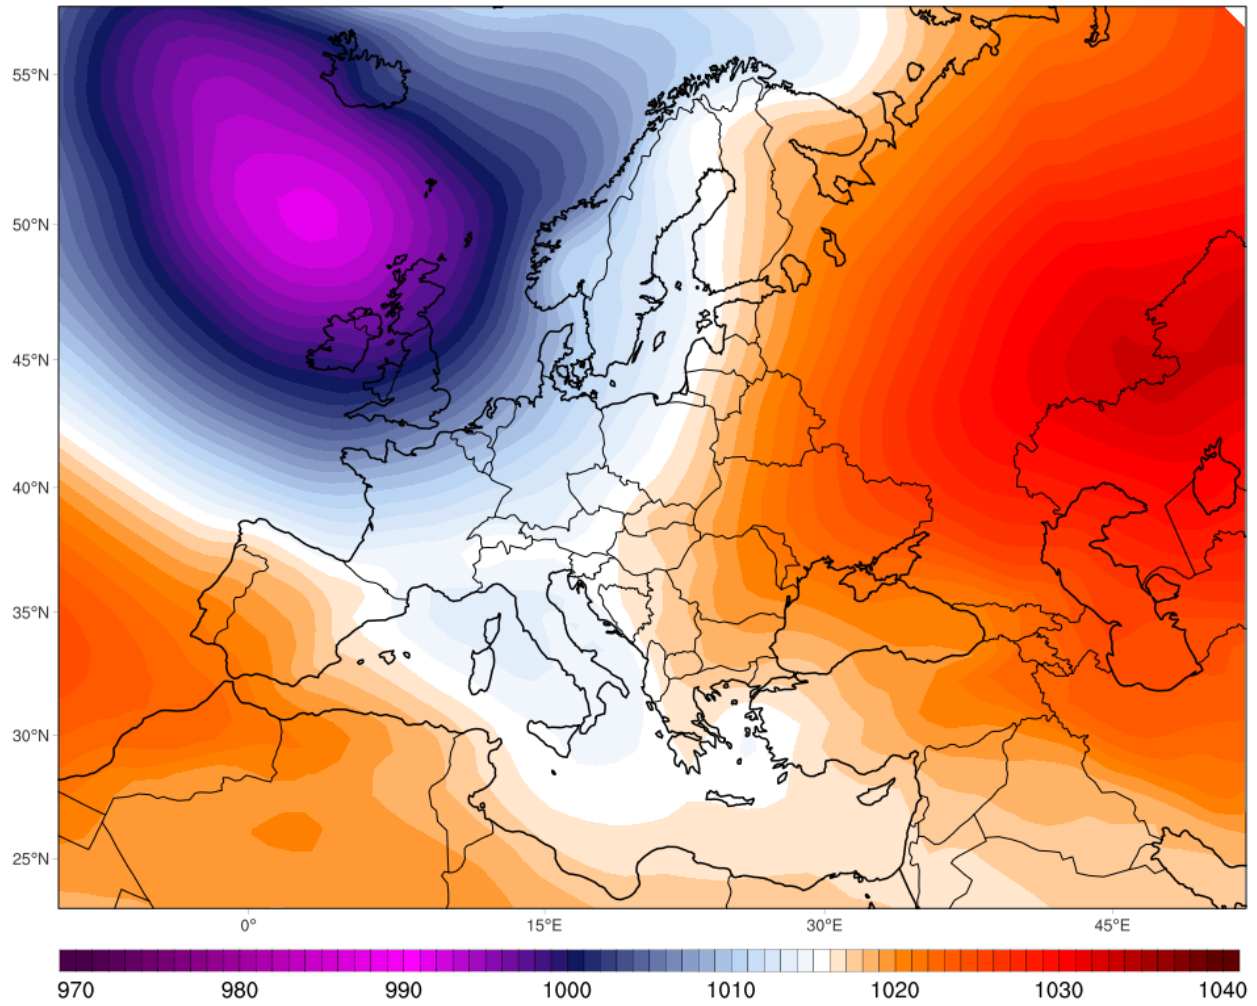

ClimateReanalyzer.org | Climate Change Institute | University of Maine

56  
57  
58

**Figure S3.** Mean sea-level pressure map of Europe obtained from Climate Reanalyzer™ using ECMWF ERA-20C dataset for February, 1915.

Mean Sea Level Pressure (hPa)  
NDJ 1915

ECMWF ERA-20C

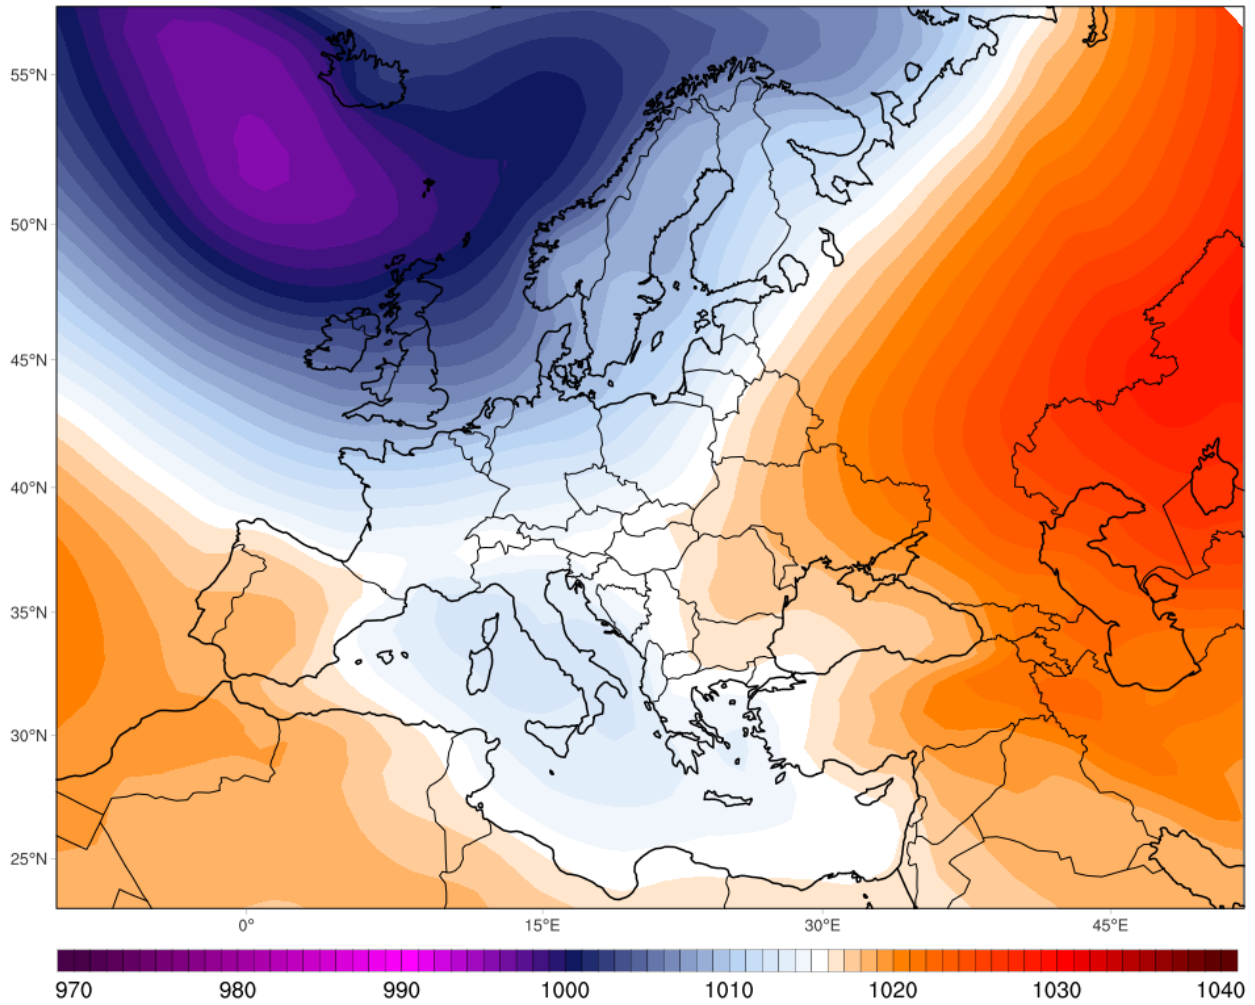

60  
61  
62  
63

**Figure S4.** Mean sea-level pressure map of Europe obtained from Climate Reanalyzer™ using ECMWF ERA-20C dataset for November-December, 1915, and January 1916.

Mean Sea Level Pressure (hPa)  
December 1916

ECMWF ERA-20C

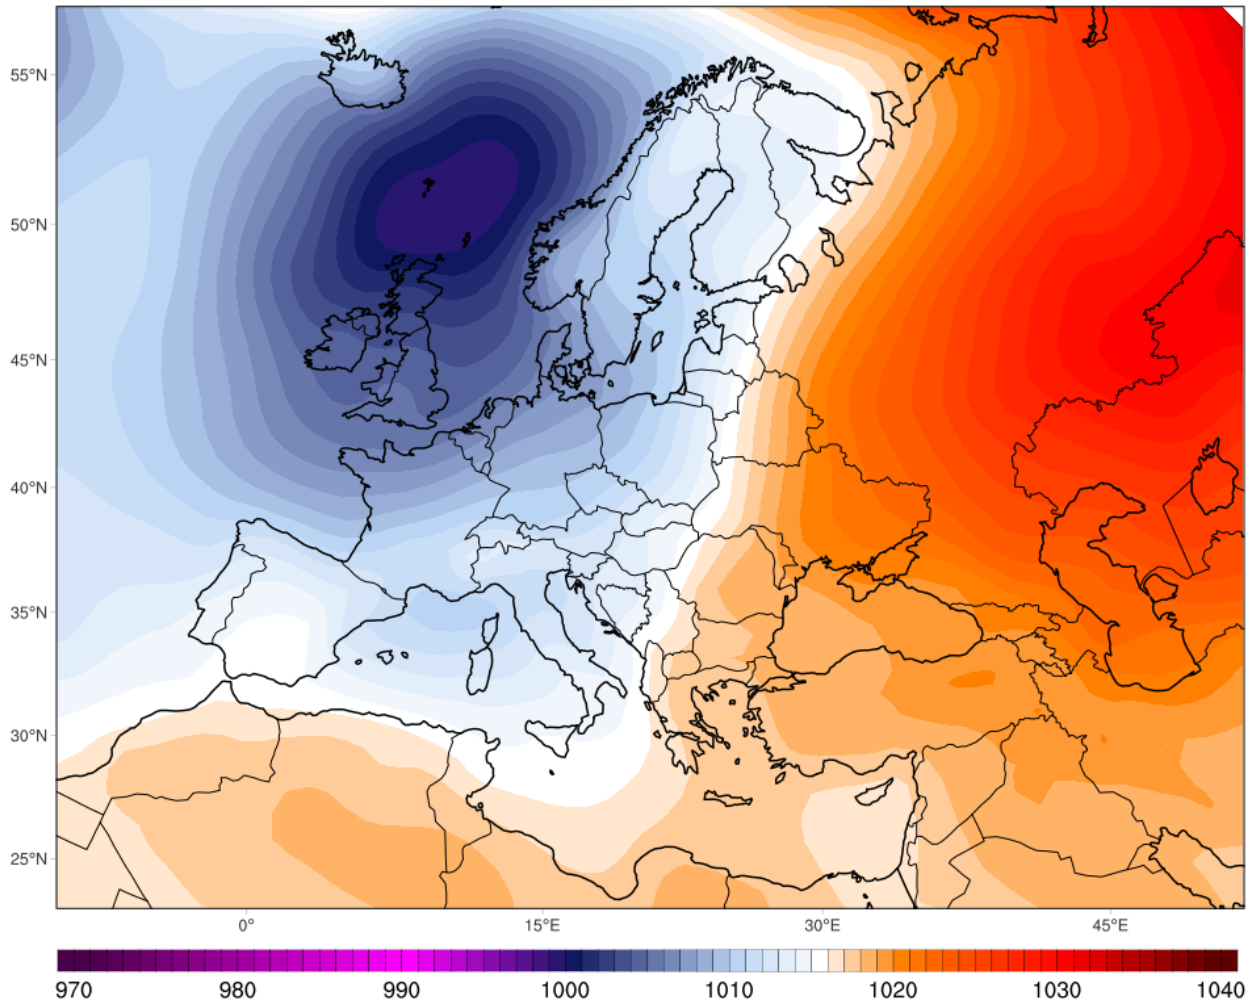

ClimateReanalyzer.org | Climate Change Institute | University of Maine

64  
65  
66

**Figure S5.** Mean sea-level pressure map of Europe obtained from Climate Reanalyzer™ using ECMWF ERA-20C dataset for December, 1916.

Mean Sea Level Pressure (hPa)  
August 1917

ECMWF ERA-20C

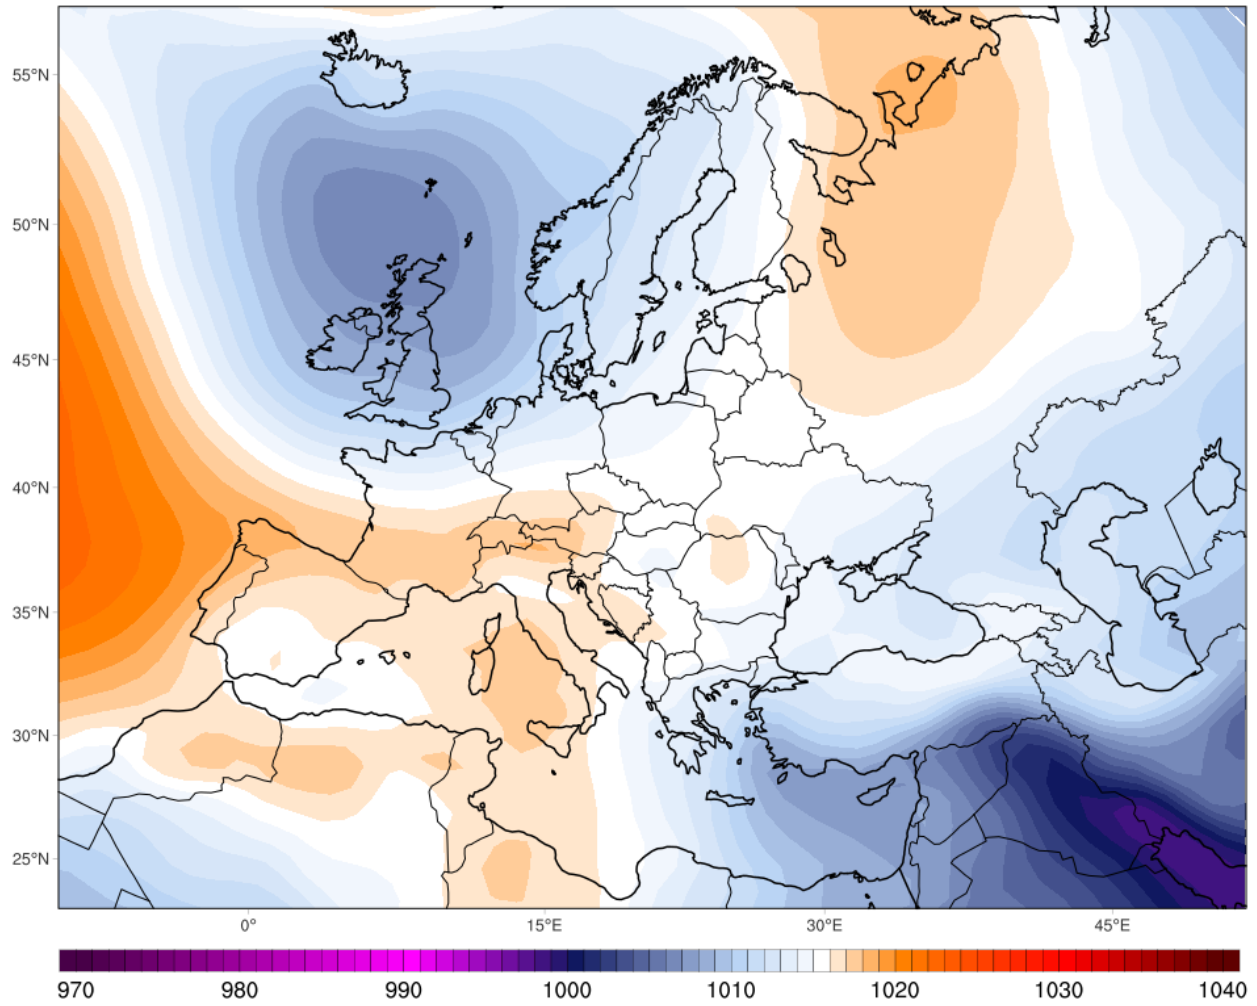

ClimateReanalyzer.org | Climate Change Institute | University of Maine

67  
68 **Figure S6.** Mean sea-level pressure map of Europe obtained from Climate Reanalyzer™ using  
69 ECMWF ERA-20C dataset for August, 1917.

Mean Sea Level Pressure (hPa)  
February 1919

ECMWF ERA-20C

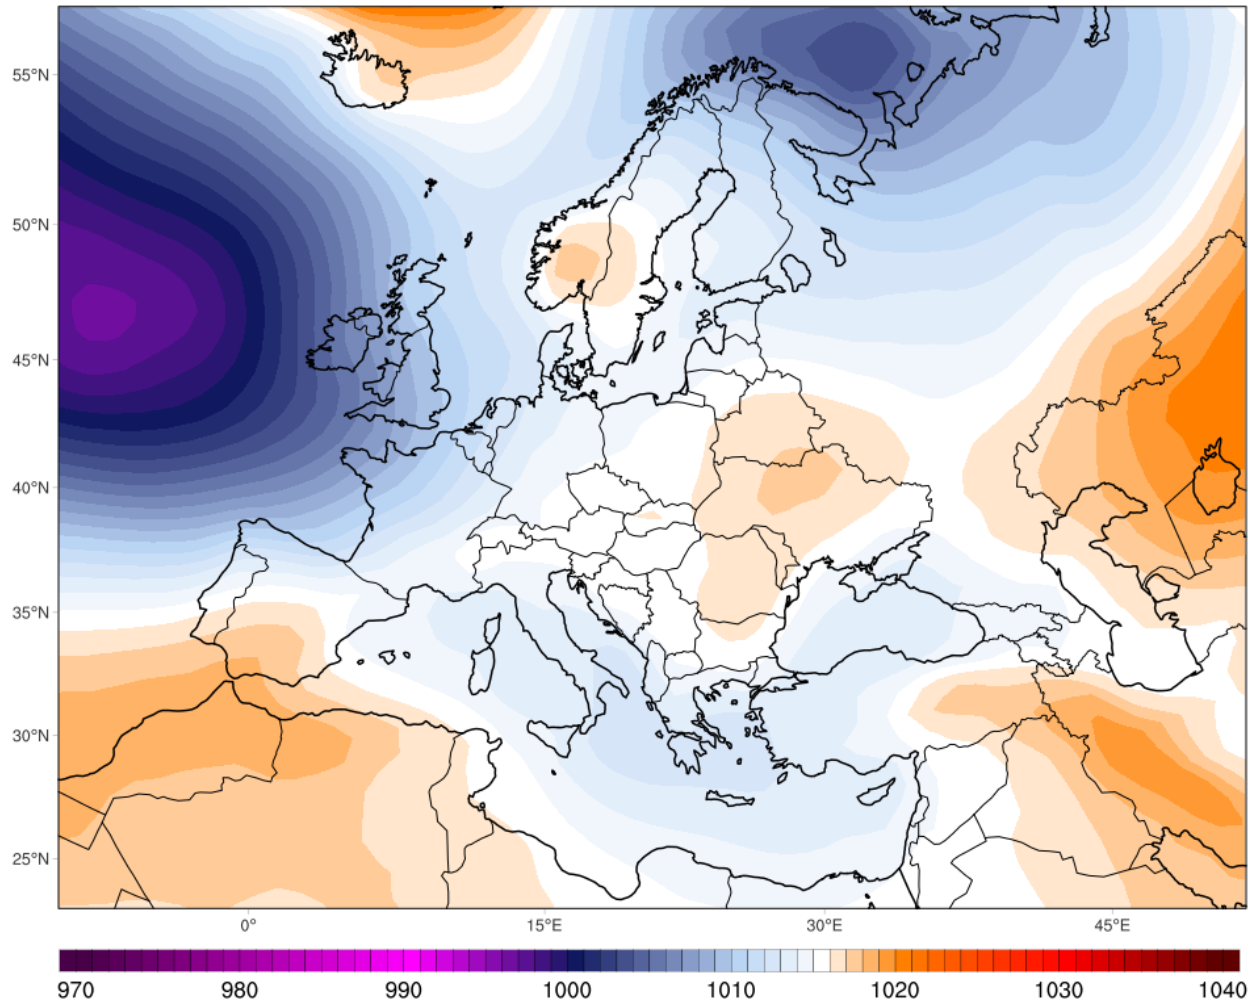

ClimateReanalyzer.org | Climate Change Institute | University of Maine

70  
71  
72

**Figure S7.** Mean sea-level pressure map of Europe obtained from Climate Reanalyzer™ using ECMWF ERA-20C dataset for February, 1919.
